# Effects of Long-Term Meditation Practices on Sensorimotor Rhythm Based BCI Learning

1 **Xiyuan Jiang<sup>1</sup>, Emily Lopez<sup>1</sup>, James Stieger<sup>1,2</sup>, Carol Greco<sup>3</sup>, Bin He<sup>1\*</sup>**

2 <sup>1</sup>Department of Biomedical Engineering, Carnegie Mellon University, Pittsburgh, PA, United States

3 <sup>2</sup>Department of Biomedical Engineering, University of Minnesota, Minneapolis, MN, United States

4 <sup>3</sup>Department of Psychiatry, University of Pittsburgh, Pittsburgh, PA, United States

5 **\* Correspondence:**

6 Bin He

7 bhe1@andrew.cmu.edu

8 **Keywords: brain-computer interface, BCI, meditation, mindfulness, EEG**

9 **Abstract**

10 Sensorimotor rhythm (SMR) based brain-computer interfaces (BCIs) provide an alternative pathway  
11 for users to perform motor control using motor imagery (MI). Despite the non-invasiveness, ease of  
12 use and low cost, this kind of BCI has limitation due to long training times and BCI inefficiency—  
13 where a subpopulation cannot generate decodable EEG signals to perform the control task. Meditation  
14 is a mental training method to improve mindfulness and awareness, and is reported to have a positive  
15 effect on one's mental state. Here we investigate the behavioral and electrophysiological differences  
16 between experienced meditators and meditation naïve subjects in 1-dimensional and 2-dimensional  
17 cursor control tasks. We found that within subjects who have room for improvement, meditators  
18 outperformed control subjects in both tasks, and there were fewer BCI insufficient subjects in the  
19 meditator group. Finally, we also explored the neurophysiological difference between the two groups,  
20 and showed that meditators had higher SMR predictor and were better able to generate decodable EEG  
21 signals to achieve SMR BCI control.

22

## 23 **1 Introduction**

24 Decades of research have sought to find alternative methods of communication between the human  
25 brain and the outside world. With the ever-growing knowledge in the neuroscience field, scientists  
26 have designed the brain-computer interface (BCI) to achieve this goal (Wolpaw et al., 2002; He et al.,  
27 2020). A BCI attempts to recognize the user's intent by decoding her/his neurophysiological signals  
28 and then converts this intent into commands to control objects, such as a cursor on a computer screen  
29 (Wolpaw et al., 1991; Trejo et al., 2006), a quadcopter (LaFleur et al., 2013) or a robotic arm in space  
30 (Meng et al., 2016; Edelman et al., 2019).

31 One of the main goals for the BCI is to help people suffering from various kinds of neuromuscular  
32 diseases, such as amyotrophic lateral sclerosis (ALS), stroke, and spinal cord injury (Armour et al.,  
33 2016), to regain a certain degree of movement ability (Rebsamen et al., 2010; Ang et al., 2015). Despite  
34 limited ability to move, cognitive ability in this population remains partially or fully intact. Therefore,  
35 it would be a significant improvement in quality of life to use a BCI to complete daily life tasks.

36 BCI have been designed to decode various kinds of brain signals: such as neurons' action  
37 potentials using multielectrode arrays (Maynard et al., 1997), electrical signal over the cortex using  
38 ECoG (Schalk et al., 2007), and electrical signal over the scalp using EEG (He et al., 2015). Among  
39 all the recording techniques, BCI based on EEG is one of the most widely used in research and clinical  
40 settings due to its ease of use, relatively low costs, and high temporal resolution (He et al., 2015). The  
41 SMR or mu rhythm is generated by the synchronized electric brain activity over the motor cortex area,  
42 and has a frequency range of around 8 - 12 Hz (Pfurtscheller et al., 2006; Bernier et al., 2007). In BCI  
43 application, the frequency band centered at 12Hz (Cassady et al., 2014; Meng et al., 2016, 2018; Stieger  
44 et al., 2020) was shown to be effective in SMR control. Event-related desynchronization (ERD) occurs  
45 when the amplitude of mu rhythm decreases in response to a person moving or imagining moving  
46 her/his body (Pfurtscheller and Aranibar, 1979). On the other hand, when a person stops moving or  
47 imagining moving, the amplitude of mu rhythm increases, termed event-related synchronization (ERS).  
48 The SMR based BCI is a well-established BCI modality, and it has been demonstrated that people can  
49 perform multi-dimensional cursor control (McFarland et al., 2010; Meng et al., 2018), drone control  
50 (LaFleur et al., 2013), wheelchair control (Galán et al., 2008; Huang et al., 2012), and robotic arm  
51 control (Meng et al., 2016; Edelman et al., 2019) with SMR BCI.

52 Despite the progress of SMR based BCI, challenges exist. For example, unlike EEG BCI based  
53 on P300 (Fazel-Rezai et al., 2012) and steady state visually evoked potentials (ssVEP) (Bakardjian et  
54 al., 2010), SMR based BCI usually requires several sessions of training, and around 20% of subjects  
55 are not able to achieve accurate control even after training (Blankertz et al., 2010). While efforts have  
56 been mainly focused on developing better decoding algorithms and recording techniques (Lotte and  
57 Guan, 2011), i.e. from the 'computer' perspective of BCI, limited attention has been drawn to  
58 enhancing people's ability to generate more decodable EEG signals, i.e. from the 'brain' side. For the  
59 latter, the high-level goal is to determine, given the same BCI system, if there exists a subpopulation  
60 who is better able to control it, and if a certain kind of training or intervention could be developed to  
61 equip ordinary people with this BCI control ability.

62 Prior literature has suggested that meditation shows a distinct change in one's brain structure,  
63 and meditators tend to develop the ability to better control their attention and awareness (Chan and  
64 Woollacott, 2007; Tang et al., 2007; Moore and Malinowski, 2009). In the search for optimal training  
65 methods in preparation for the SMR based BCI control, previous work has investigated whether people  
66 with meditation experience are better able to control SMR based BCI (Cassady et al., 2014; Tan et al.,  
67 2014, 2015; Kober et al., 2017; Stieger et al., 2020), or just generate ERD/ERS without controlling a  
68 BCI system (Kerr et al., 2013; Rimbart et al., 2019). Similar to what Tang and colleagues (Tang et al.,  
69 2015) summarized for the neuroscience aspect of meditation studies, efforts to study the meditation  
70 effect on SMR BCI could be divided into two categories, longitudinal studies and cross-sectional  
71 studies:

72 1) Longitudinal studies separated meditation-naïve subjects into a meditation group and a control  
73 group, with the meditation group receiving meditation training and control group receive either active  
74 control tasks or no specific task (Tan et al., 2014, 2015; Botrel and Kübler, 2019; Stieger et al., 2020).  
75 After that, BCI performance and/or neurophysiological difference between the two groups was  
76 assessed.

77 2) Cross-sectional studies investigated the difference in BCI/neurofeedback learning between  
78 people who already have meditation experience and meditation naïve subjects (Cassady et al., 2014;  
79 Kober et al., 2017). In Cassady and colleague's work (Cassady et al., 2014), the meditation group was  
80 shown to have better performance compared with the control group in terms of performance, learning

81 speed, and information transfer rate. However, most of the claims in this study focused on the behavior  
82 difference. A more in-depth analysis of the neurophysiological difference is needed. Another question  
83 left unanswered is whether meditators are also better at more complex tasks, such as 2-dimension (2D)  
84 cursor control. In another study, Kober and colleague (Kober et al., 2017) found that people who pray  
85 frequently had a higher ability to control the SMR, but the recording was limited to Cz electrode only  
86 and the control dimension was limited to 1-dimension (1D).

87 Is meditation experience indeed a significant factor affecting SMR BCI learning? For example,  
88 Stieger and colleagues (Stieger et al., 2020) found that after an 8-week mindfulness-based stress  
89 reduction training, subjects indeed had significant performance improvements in the up/down task  
90 (both hands motor imagery to go up and rest to go down), but for the left/right control task (left/right  
91 hand motor imagery) the effect was not significant. Botrel and colleagues (Botrel and Kübler, 2019)  
92 found that week-long visuomotor coordination and relaxation training does not improve the SMR based  
93 BCI performance. One of the reasons for this kind of disagreement may be a dose-effect, meaning that  
94 it might take a longer meditation time to affect BCI learning in a significant manner.

95 With these questions in mind, we recruited experienced meditators and controls and investigated  
96 the difference in SMR BCI learning between these two groups in both 1D and 2D tasks. The aims for  
97 this cross-sectional study are as follows: First, to verify the conclusions in the pilot study (Cassady et  
98 al., 2014) that meditators had better learning in SMR BCI with an independent investigation; Second,  
99 to explore the behavior difference between the two groups in a more complex 2D task; Third, to  
100 investigate the neurophysiological difference between these two groups.

## 101 **2 Methods**

### 102 **2.1 Participants**

103 The experimental procedures involving human subjects described in the current study were approved  
104 by the Institutional Review Board (IRB) of Carnegie Mellon University, all participants provided  
105 written informed consent. We utilized a single-blind two-group experimental design, with a meditation  
106 group and a control group. The experimenters did not know the identity of the subject in relation to  
107 their meditation experience throughout the whole study, and avoided any conversation related to  
108 meditation. Subjects were recruited via flyers in the surrounding area, as well as an email sent out to  
109 local mindfulness groups. The meditation group consisted of 16 healthy subjects (age = 37.6 +/- 15.1)  
110 with a history of meditation practice, as evaluated by a questionnaire regarding personal meditation  
111 practice completed prior to experimentation. To be accepted into the meditator group, individuals had  
112 to cite at least a year of frequent and consistent practice, with most subjects having 2 or more years of  
113 consistent practice. Most of the meditators' practices belong to the subgroup of Vipassana, Zen,  
114 Mindfulness, and Buddhism. The control group consists of 19 healthy individuals (age = 24.8 +/- 8.7)  
115 with no prior meditation experience. Both groups had no prior BCI experience. We continually asked  
116 participants to describe their motor imagery strategies. If these strategies diverged from the kinesthetic  
117 motor imagery they were asked to perform, we reminded them to focus on the sensations and intention  
118 behind the imagined motion of their hands. We excluded one subject (identity: meditator) from the  
119 analysis because she/he did not follow the motor imagery guidelines.

### 120 **2.2 Surveys**

121 In the first session, we asked subjects to fill out two surveys before the BCI experiment. Both surveys  
122 aim to measure one's level of mindfulness. The first survey is called the Freiburg Mindfulness  
123 Inventory (FMI) (Walach et al., 2006), which has 14 statements such as 'I am open to the experience

124 of the present moment'. The subject was asked to use a 1-4 scale to indicate how often she/he has such  
125 experience. The FMI score was calculated by summing up the answers to each question with proper  
126 recode of one question (Walach et al., 2006). The second survey is called Day-to-Day Experiences  
127 (Brown and Ryan, 2003), which has 15 questions, such as 'I find it difficult to stay focused on what's  
128 happening in the present', the subject was asked to use a 1-6 scale to indicate how often she/he has  
129 such experience. In the end, the Mindful Attention Awareness Scale (MAAS) was calculated by  
130 averaging answers to each question. In both surveys, higher score indicates higher level of mindfulness.

### 131 **2.3 Data acquisition**

132 Subjects in both groups went through 6 sessions of BCI training within 4 – 6 weeks, with at least one  
133 experiment per week. Each experimental session lasted about 2 hours, with a 9-minute break in the  
134 middle. EEG data were recorded throughout the session using the Neuroscan SynAmps system with  
135 64-channel EEG QuikCap (Neuroscan Inc, Charlotte, NC). The sampling frequency was set to 1000  
136 Hz, and the impedance was kept below 5k $\Omega$  during the preparation. The experimenter checked the  
137 impedance in the break to make sure it remained below 5k $\Omega$ .

138 The experiment setup is shown in Figure 1. Each session began with a 5-minute warmup task,  
139 where the subject was instructed to perform left- or right-hand motor imagery by focusing on imagining  
140 the sensations and intention of opening/closing the left/right hand. After that, the subject was asked to  
141 perform BCI cursor control of three different tasks: left/right (LR), up/down (UD), and 2D, by moving  
142 the ball to the corresponding bar with motor imagery. BCI2000 was used to perform a standard SMR  
143 BCI cursor task (Schalk et al., 2004), where the mu rhythm band power of C3 and C4 electrodes after  
144 small Laplacian filter was used as features. In this work, the mu rhythm was set to be centered at 12  
145 Hz (Meng et al., 2016, 2018) with a 3 Hz bin (Stieger et al., 2020), and was estimated using an  
146 autoregressive approach. In the LR task, subjects were told to image opening/closing the right hand as  
147 they practiced in the warm-up to move the ball to the right, and left-hand motor imagery to move the  
148 ball to the left. After subjects performed 3 rounds of LR BCI, with each round consisting of 25 trials,  
149 a similar explanation was given for the up-down (UD) BCI task, except they were instructed to imagine  
150 both hands opening and closing to move the ball up, and to rest, in other words try to clear their minds  
151 to move the ball down. After subjects performed three rounds of UD BCI, they moved onto the 2D  
152 task, in which the same instructions were implemented to move the ball up, down, left, or right  
153 according to which bar appeared on the screen. After one block (3 rounds) each of LR, UD, and 2D  
154 BCI, the subjects were given a 9-minute break in which they were instructed to read and rate comics  
155 by pressing a key on the keyboard, this standard 'break task' ensures that subjects use the same  
156 approach to relax. After the break, they completed one more block each of LR, UD, and 2D BCI.

### 157 **2.4 Performance metric**

158 We quantify the performance using percent valid correct, or PVC (Cassady et al., 2014; Meng et al.,  
159 2016; Edelman et al., 2019), which is the ratio between the number of hit trials and number of hit trials  
160 plus the number of missed trials. When analyzing the data, unless stated otherwise, we excluded  
161 subjects with baseline PVC > 90% in both LR and UD conditions, because these subjects usually did  
162 not have much room for learning. 4 control subjects were excluded under this criterion, accounting for  
163 11% of the total subjects. Together with the subject excluded due to not following the MI guideline (1  
164 meditator), the number of subjects involved in the analysis is 15 meditators and 15 controls.

### 165 **2.5 Offline EEG data analysis**

166 We bandpass filtered the EEG data using a Hamming window sinc FIR filter with the passband set  
167 between 1 Hz and 100 Hz, then down sampled to 250Hz. ICA was performed to remove artifacts such  
168 as eye blinking. After that, complex Morlet wavelet convolution was used to extract the power of the  
169 mu frequency band (3 Hz bin centered at 12 Hz).

170 The neurophysiological predictor, or SMR predictor measures the difference between mu band  
171 power and the  $1/f$  noise floor in a power-frequency plot for C3 and C4 (Blankertz et al., 2010).  
172 Concretely, the EEG power spectrum at rest could be fitted with the sum of a  $1/f$  noise floor,  
173  $n(f; \lambda, \mathbf{k}_n)$  and two Gaussian distributions, centered at mu rhythm and beta rhythm,  $g_\alpha(f; \mu_\alpha, \sigma_\alpha)$  and  
174  $g_\beta(f; \mu_\beta, \sigma_\beta)$ . In this study, the power spectral density is equal to the mean of C3 and C4 band power  
175 after small Laplacian spatial filtering during the inter-trial resting state, combining LR conditions and  
176 UD conditions.

$$177 \quad \widehat{PSD}(f; \lambda, \sigma, k) = n(f; \lambda, k_n) + g_\alpha(f; \mu_\alpha, \sigma_\alpha) + g_\beta(f; \mu_\beta, \sigma_\beta)$$

$$178 \quad n(f; \lambda, \mathbf{k}_n) = k_{n1} + \frac{k_{n2}}{f^\lambda}$$

$$179 \quad g_\alpha(f; \mu_\alpha, \sigma_\alpha) = k_\alpha N(f; \mu_\alpha, \sigma_\alpha)$$

$$180 \quad g_\beta(f; \mu_\beta, \sigma_\beta) = k_\beta N(f; \mu_\beta, \sigma_\beta)$$

181 The SMR predictor (dB) is calculated individually for C3 and C4 electrode mu rhythm band  
182 power after small Laplacian spatial filtering.

$$183 \quad Predictor = 10 \cdot \log_{10} \frac{PSD(mu)}{n(mu)}$$

184 In the case where the algorithm could not find a curve to fit, we manually selected 5~10  
185 representative data points to describe the  $1/f$  noise floor function by following the trend of the PSD  
186 curve and fitted these points using  $n(f; \lambda, \mathbf{k}_n)$ . We discard a subject and session pair if the PSD does  
187 not follow a  $1/f$  decrease trend. The percentage of data points discarded was 10.5%.

188 We designed a method to calculate the control signal during task execution to be as close to the  
189 real condition as possible. Concretely, we first calculated the C3 and C4 electrode frequency band  
190 power after small Laplacian spatial filtering, denoted  $P_{C3}$  and  $P_{C4}$ . Then the raw control signal was  
191 calculated using the following equation:

$$192 \quad CS_{raw,LR} = P_{C4} - P_{C3}$$

$$193 \quad CS_{raw,UD} = P_{C4} + P_{C3}$$

194 Then we applied a similar z-scored procedure to the raw control signal as the BCI 2000  
195 platform,

$$196 \quad CS_{real} = G \times (CS_{raw} - offset)$$

197 Where  $G$  and  $offset$  are set to make the  $CS_{real}$  zero mean and unit variance. The difference  
198 between this offline z-score and online approach is that the latter is causal and adaptive, i.e.  $G$  and

199 *offset* is calculated via past 30 seconds of window, and change as time goes on. As shown in Supp  
200 Figure S1, we found that control signal under this definition could better explain the variability of  
201 performance than the ERD/ERS method, i.e. band power during task execution divided by resting state  
202 band power.

203 We quantify the contrast between two contexts in a task (e.g. left trials and right trials in LR  
204 task) using Fisher score (Perdikis et al., 2018).

205 
$$FS = \frac{|\mu_1 - \mu_2|}{\sqrt{s_1^2 + s_2^2}}$$

206 Where  $\mu_1$  and  $\mu_2$  are the means and  $s_1^2$  and  $s_2^2$  are the variance of context 1 and context 2's band  
207 power in one session. The fisher score is calculated independently for each channel.

208

## 209 **3 Results**

### 210 **3.1 Survey results**

211 In both surveys, we found meditators had higher scores than control subjects. Concretely, the FMI  
212 score for meditator is  $45.2 \pm 5.0$ , while for control subject it is  $37.3 \pm 6.9$ . The difference is significant  
213 (Wilcoxon rank-sum test,  $Z = 3.11$ ,  $p = 0.0018$ ). The MAAS score for meditator is  $4.51 \pm 0.84$ , while  
214 for control subject it is  $3.74 \pm 0.67$ . The difference is significant (Wilcoxon rank-sum test,  $Z = 2.69$ ,  
215  $p = 0.007$ ). Bar plots for the two groups' scores are shown in Figure 2(A). The same observation also  
216 holds when including subjects who are BCI proficient at baseline. These results serve as an additional  
217 proof, apart from the self-reported meditation experiences, that the meditators had higher level of  
218 mindfulness than the control group. In addition to the group difference, we also calculated the  
219 correlation between these survey results and performance. We used baseline PVC as performance  
220 because this session is when the surveys were filled out. The correlation between survey results and  
221 UD PVC turned out to be significant. Specifically, for FMI,  $r = 0.41$ ,  $p = 0.014$ , and for MAAS,  $r =$   
222  $0.41$ ,  $p = 0.017$ .

### 223 **3.2 Group averaged performance**

224 Within the population who are not BCI proficient at baseline (i.e. subjects did not have > 90% of PVC  
225 in both LR and UD in session 1), we found that meditators achieved better performance (PVC)  
226 compared with control subjects, and this difference was consistent throughout the six sessions. The  
227 group averaged performance in the baseline and final session is shown in Table S1, and the averaged  
228 performance for all sessions is shown in Figure 2.

229 We modeled the learning progress as a linear regression model. To see if the regression lines  
230 between meditators and controls are different, we used analysis of covariance (ANCOVA). We found  
231 that the difference between groups was significant in all three tasks ( $F(1,176) = 14.62, 17.34, 12.16$   
232 with  $p = 0.0002, <0.0001, 0.0006$  for LR, UD and 2D). The learning effects in UD and 2D task were  
233 also significant ( $F(1,176) = 4.38, 4.51$ ,  $p = 0.03, 0.03$  for UD and 2D). However, the learning effect  
234 did not show significance in LR ( $F(1,176) = 2.76$ ,  $p = 0.10$ ). There were no significant interaction  
235 (session x group) effects in any of the three tasks ( $F(1,176) = 0.05, 0, 0.23$  with  $p = 0.83, 0.96, 0.06$  for  
236 LR, UD and 2D), indicating that the learning speed was not different between two groups.

237 Realizing the fact that the 2D task is the combination of LR and UD, we next separated the LR  
238 and UD task within the 2D. Interestingly, we found that within the 2D task, meditators had a higher  
239 baseline of LR, but for the UD these two groups were at the same level. Further, the learning curve  
240 showed that meditators had numerically better learning compared with controls in the UD within 2D.  
241 Statistical analysis using ANCOVA shows that performance in both LR and UD within the 2D task  
242 was different between two groups ( $F(1,176) = 14.83, 5.91, p = 0.0002, 0.016$  for LR and UD within  
243 2D), as well as the learning effect of UD ( $F(1,176) = 7.36, p = 0.0007$ ). On the other hand, LR within  
244 2D did not show a significant learning effect ( $F(1,176) = 1.33, p = 0.25$ ). The learning speed between  
245 two groups was not significantly different between groups as well ( $F(1,176) = 0.19, 0.25, p = 0.665,$   
246  $0.619$  for LR and UD within 2D).

### 247 **3.3 Competency curve**

248 While group averaged PVC is a good indicator of performance, there are several drawbacks. First, it  
249 only provides information on the overall trend of performance during BCI learning; we still do not  
250 know how many subjects remain BCI inefficient. Second, it does not provide information regarding  
251 within-session learning.

252 To intuitively show how learning occurs in the two groups, we plotted the percentage of  
253 subjects whose PVC remained below a threshold, as sessions go on. We set the threshold as 70% for  
254 1D control and 40% for 2D control (Combrisson and Jerbi, 2015), but we obtain similar results under  
255 varied thresholds. To cope with potential fluctuation of performance, a subject passes the threshold if  
256 he/she meets one of the following criteria: achieving an averaged PVC > threshold in three consecutive  
257 runs, or achieving an averaged PVC > threshold in one single session (Cassady et al., 2014). The result  
258 is shown in Figure 3.

259 There are two observations from this plot. First, after six sessions of learning, the percentage of  
260 BCI inefficient subjects appears to be lower in meditators. The percentage of BCI inefficient subjects  
261 are 20% (46%), 6% (26%) and 6% (33%) for meditators(controls), in LR, UD and 2D tasks,  
262 respectively. Therefore, in all three tasks, meditators indeed had numerically less BCI inefficient  
263 subjects after 6 sessions or 36 runs of learning, but Chi-squared tests did not reveal significance for the  
264 proportion of BCI inefficiency between two groups ( $X^2(1, N = 30) = 2.4, 2.16, 3.33, p = 0.12, 0.14$   
265 and  $0.06$  for LR, UD and 2D,  $p < 0.05$ ). Second, the speed of learning, the LR and the UD plot showed  
266 a steeper decline during the initial 6 runs, i.e. the baseline session. This means that the learning speed  
267 of meditators appears to be faster than control subjects. Besides, while previous studies showed that  
268 BCI learning occurs in a session by session base (Meng et al., 2016), our results showed that learning  
269 could also occur within a 2-hour session. We also noticed that compared with 1D tasks (LR, UD), both  
270 groups in the 2D task showed a similar learning curve in the first 20 runs, i.e. in the first three sessions.  
271 After that, meditators showed a numerically better learning speed compared with control subjects. This  
272 observation is consistent with the previous group average performance in the sense that in UD within  
273 the 2D task, meditators had numerically larger improvement starting from the third session. In addition,  
274 it also shows that 2D control is indeed more difficult than 1D control, requiring more training time.

### 275 **3.4 Group averaged topology during task**

276 Figure 4 shows the LR and UD task fisher score topology (Perdikis et al., 2018) for meditators and  
277 controls. From the plot, a gradual increase of motor cortex area high alpha power could be seen in both  
278 groups, indicating that both groups were able to increase the contrast of two opposite conditions  
279 through voluntary motor imagery as learning progresses. However, this plot did not provide  
280 quantitative information regarding whether meditators had a higher baseline of C3 and C4 high alpha

281 power, or if they exhibit better learning. To further investigate the effect of meditation experience on  
282 these quantities, we looked into the SMR predictor during the inter-trial resting state, and control signal  
283 during task execution.

### 284 **3.5 Neurophysiological predictor**

285 Blankertz and colleagues (Blankertz et al., 2010) found that in the resting state power spectral density  
286 plot of C3 and C4 electrodes, the difference between mu rhythm peak and noise level baseline is a  
287 significant predictor of the BCI performance. Here we tried to investigate the difference in SMR  
288 predictor between meditators and controls. As shown in Figure 5 (A), we first fit a linear regression  
289 model between the SMR predictor and PVC. We found that in the LR task, the correlation coefficient  
290 between SMR predictor and PVC is  $r = 0.150$  with a marginal significant  $p = 0.057$ , and in the UD  
291 task,  $r = 0.219$  with  $p = 0.005$ . We noticed that there were outlier points for one subject that were far  
292 away from the population, therefore we also recalculated the correlation after removing this subject  
293 (Blankertz et al., 2010). After removing the outlier, in the LR task, the correlation coefficient was  $r =$   
294  $0.385$  with  $p < 0.001$ , and in the UD task,  $r = 0.268$  with  $p < 0.001$ . Our correlation coefficient was  
295 smaller than that of Blankertz and colleague's work (Blankertz et al., 2010). The difference might be  
296 due to the task design and subject variability. We next asked if experienced meditators have a better  
297 SMR predictor than controls. We found that the difference between the two groups was statistically  
298 significant ( $F(1,157) = 16.69$ ,  $p < 0.001$ ), but we did not observe the learning effect to be significant  
299 ( $F(1,157) = 2.2$ ,  $p = 0.140$ ), and there was no learning speed difference between groups ( $F(1,157) =$   
300  $0.03$ ,  $p = 0.859$ ), as shown in Figure 5 (B).

### 301 **3.6 Control signal baseline and learning**

302 Given the behavior difference described in the previous section, the next question to ask is whether  
303 meditators exhibit better overall and learning of  $\Delta$ Ctrl Signal, defined as the control signal difference  
304 between two opposite motor imagery tasks (left versus right, up versus down). Figure 5(c)(d) shows  
305 the group averaged  $\Delta$ Ctrl Signal as sessions go on. For LR, before session 4, the two groups exhibited  
306 similar values, and starting from session 4, meditators had higher  $\Delta$ Ctrl Signal than controls, but the  
307 variance was high, and ANCOVA analysis did not reveal group, session, or the learning effect  
308 differences ( $F(1,176) = 3.34$ ,  $1$ ,  $0.5$ ,  $p = 0.07$ ,  $0.32$  and  $0.48$  for group, session or the learning  
309 difference). On the other hand, for the UD task, a numerical increase trend could be seen in both  
310 meditators and controls. The difference between the two groups was significant ( $F(1,176) = 4.19$ ,  $p =$   
311  $0.04$ ), while the learning effect and learning rate difference was not ( $F(1,176) = 0.055$  and  $0.76$ ).

## 312 **4 Discussion**

313 Reducing the training time and BCI inefficiency is critical in the application of SMR based BCI. While  
314 prior studies have tried to solve this problem from the 'brain' side of BCI by investigating the effect of  
315 meditation experience on SMR BCI learning, the relationship between these two is still not  
316 comprehensive. First, due to the large variability in the type and duration of meditation, more studies  
317 are needed to confirm the existence of such an effect. Second, it is still unclear whether and to what  
318 extend do meditators are better able to do more complex tasks than 1D control. Third, a more thorough  
319 investigation of the neurophysiological difference between these two groups is needed.

320 Our results provide insights into the effect of long-term meditation experiences on SMR based  
321 BCI. Concretely, we found that level of mindfulness is correlated with the SMR BCI performance in  
322 the UD task, and within the population who still have a margin to learn, experienced meditators had  
323 higher BCI performance compared with meditation naïve subjects. We also found that there were



324 numerically fewer BCI inefficient subjects remaining after six sessions of learning. As for task  
325 complexity, we extended the control paradigm to a more complexed 2D cursor control task. We found  
326 a similar trend when separating the LR and UD tasks within the 2D control, that meditators had higher  
327 LR within the 2D performance than controls, we also found that although meditators and controls  
328 started at approximately the same level of UD within 2D performance, numerically, meditators had  
329 better learning and resulted in higher improvement than controls; Finally, neurophysiology analysis  
330 revealed that there is a significant difference between the SMR predictor and the UD control signal  
331 between two groups. In general, the statistical differences between these two groups mainly lie in the  
332 performance, we did not find the speed of learning to be significantly different between these two  
333 groups, which could be due to the reason that given meditators already have relatively higher  
334 performance, the room for improvement becomes smaller.

335 It should be noted that our experimental task is consistent with prior work done in the same lab  
336 (Cassady et al., 2014) in terms of the platform (BCI 2000) and 1D BCI task design. However, to the  
337 best of author's knowledge, this study of comparing SMR based BCI performance between  
338 experienced meditators and controls has not been replicated. Our work was done in a different time,  
339 location, and subpopulation of experienced meditators and controls, yet we reveal results to some  
340 degree consistent with the previous work, supporting that differences exist between experienced  
341 meditators and controls in terms of SMR BCI control.

342 While the prior longitudinal study found an 8-week MBSR class mainly has effects on the UD  
343 trials (Stieger et al., 2020), our work showed that people with long term meditation experiences  
344 outperformed control subjects in both LR and UD tasks. This long-term meditation effect could be due  
345 to the plasticity introduced by meditation experience. For example, one of the main benefits of  
346 mindfulness meditation is enhanced attentional control (MacLean et al., 2010). In the SMR BCI,  
347 subjects are instructed focus on, or pay attention to the motor intention, which could regard as a specific  
348 type of attention control. Therefore, the prolonged meditation practices might serve as additional  
349 'training time' and cause the meditator group to have enhanced BCI performance. Future work along  
350 this line should investigate if ordinary people are also able to improve SMR BCI control, apart from  
351 UD tasks (Stieger et al., 2020), with more extended meditation training.

352 An alternative explanation would be the pre-existing difference in the brain structure, personality,  
353 etc., for people who choose to meditate for years (Tang et al., 2015). In other words, the subpopulation  
354 who choose to meditate for years may have attributes that contribute to a successful SMR BCI control.  
355 Nevertheless, the research focusing on SMR BCI control ability for people with different  
356 characteristics is still limited, and future work on investigating the impact of these multidimensional  
357 and interrelated personal attributes might reveal more details of SMR BCI control.

358 Another concern regarding studying these two distinct groups is the effect of age. While we tried  
359 our best to find age-matched controls for the meditators, the meditators are on average 38.5 years old  
360 and controls are on average 24.8 years old years with a 13.7 years old difference. One might argue that  
361 the fact meditators being more senior might affect our conclusion. However, we did not find the  
362 correlation between age and performance to be statistically significant. Another evidence from prior  
363 study is that cortical physiology might decrease as people age (Roland et al., 2011). Therefore, the fact  
364 that meditator being more senior does not make our conclusions invalid.

## 365 **5 Conclusion**

366 In this study, we have examined the behavior and neurophysiological differences between experienced  
367 meditators and control subjects. We found that among subjects who still have a margin to learn,  
368 meditators outperformed control subjects in terms of averaged performance, SMR predictor and control  
369 signal (in the UD task). This finding has implications on enhancing the ‘brain’ side of SMR BCI and  
370 may help overcome the limitations of SMR BCI technology, such as long training time and BCI  
371 inefficiency.

## 372 **6 Conflict of Interest**

373 The authors declare no competing interests in the work reported here.

## 374 **7 Author Contributions**

375 X.J. was involved in experiment conduct, data analysis and manuscript writeup. E.L. was involved in  
376 experiment conduct and manuscript review. J.S. was involved in study design, experiment conduct and  
377 manuscript review. C.G was involved in study design, subject recruitment and manuscript review. B.H.  
378 was involved in conception, study design, supervision, and manuscript review.

## 379 **8 Funding**

380 This work was supported in part by the National Institutes of Health (grants AT009263, MH114233,  
381 EB021027, NS096761, and EB008389).

## 382 **9 Acknowledgments**

383 We would like to thank Dr. David Creswell for useful discussions, Chang Liu and Kristie Lindblom  
384 for assistance in subject recruitment, Olivia Fernau and Chalisa Udompanyawit for assistance in  
385 experiment conduct, and Dr. Haiteng Jiang for useful discussions.

## 386 **10 Figure**

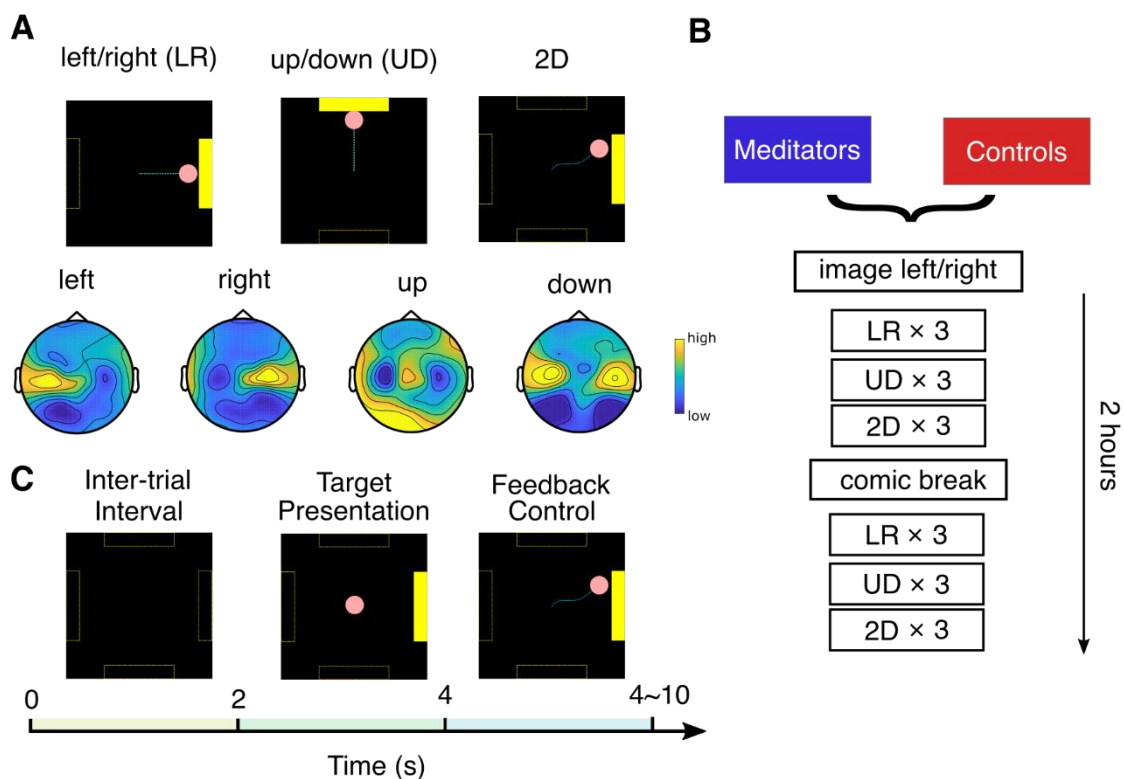

387

388 **Figure 1.** Experimental setup. (A) Top: three experiment tasks and typical cursor trajectories in  
 389 left/right (LR) control, up/down (UD) control and 2D control. The dashed lines were invisible to the  
 390 subject. Bottom: example topology of mu rhythm band power in each motor imagery class. (B)  
 391 Experiment flow of one session. (C) Each trial consists of 2s of inter-trial interval, 2s of target  
 392 presentation and 0~6s of BCI feedback control.

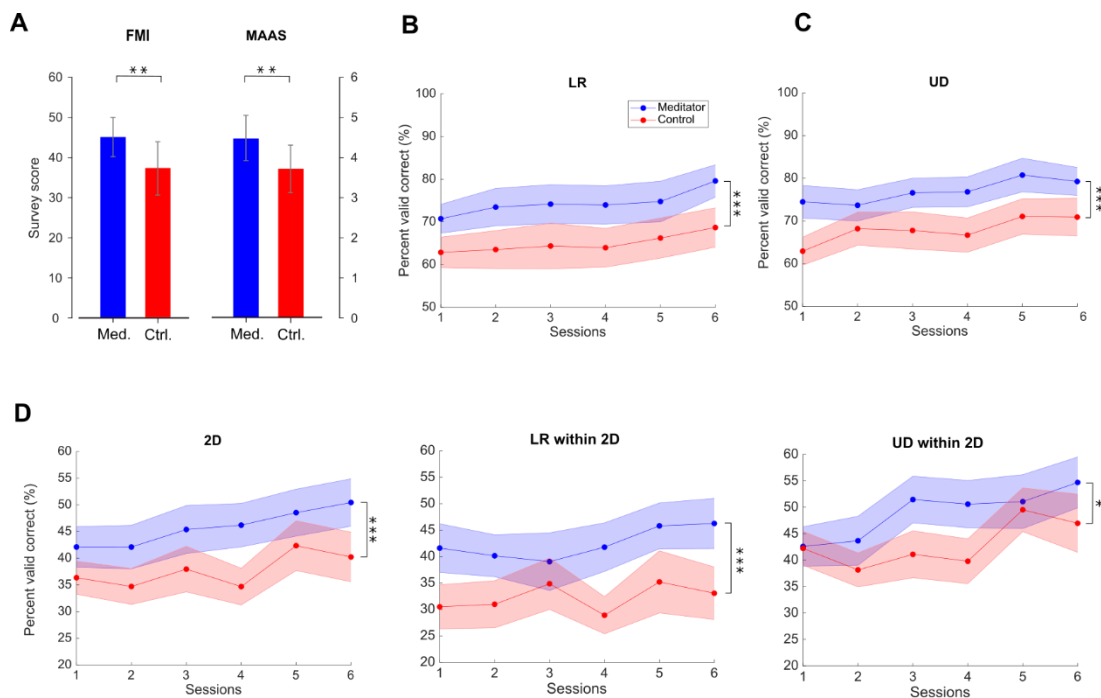

393

## Meditation effect on BCI learning

394 **Figure 2.** Survey results and group averaged performance and learning. (A) Survey results of FMI and  
395 MAAS shows that meditators have higher level of mindfulness than controls. Data are shown as  
396 mean±SD. Med. is meditator, Ctrl. is control. (B) Group LR averaged PVC±SEM for mediators and  
397 controls. Asterisk indicates significant group effect between meditator and controls with ANCOVA  
398 with  $p < 0.05$ , (C) for UD task, (d) for 2D task, LR within the 2D task and 2D within the 2D task. \*  
399 indicates group difference with  $p < 0.05$ , \*\* indicates  $p < 0.01$ , \*\*\* indicates  $p < 0.001$ , same for  
400 subsequent plots.

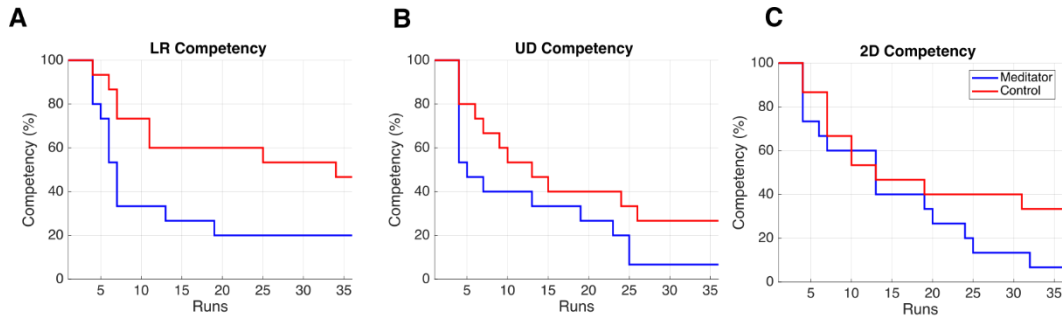

401

402 **Figure 3.** Competency curves for (A) LR, (B) UD and (C) 2D tasks. Each session has 6 runs for one  
403 task, accounting for 36 runs in total throughout the 6 training sessions. The numbers are percentage of  
404 subjects not meeting competency thresholds.

405

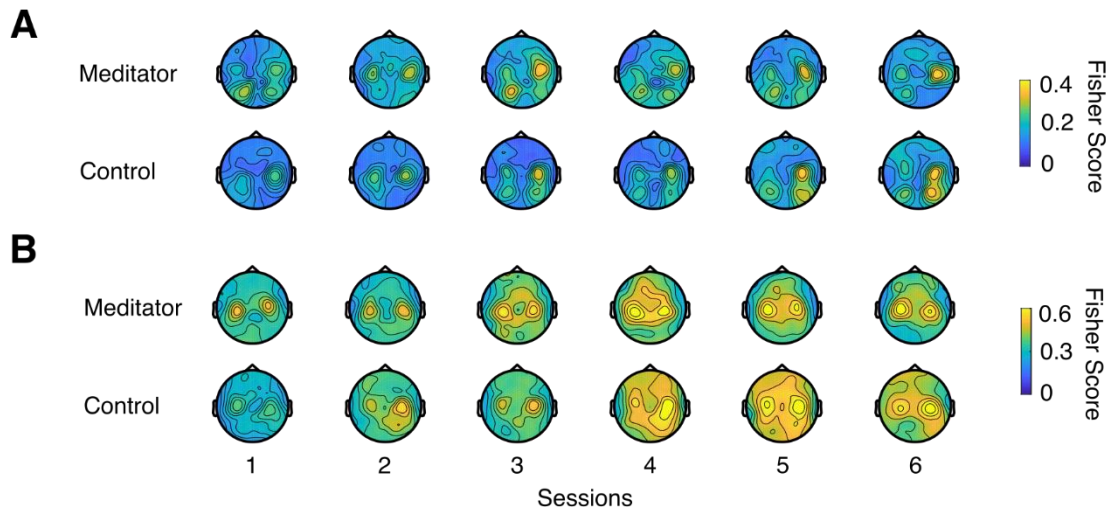

406

407 **Figure 4.** Fisher score topology for meditators and controls during the (A) LR and (B) UD task.

## Meditation effect on BCI learning

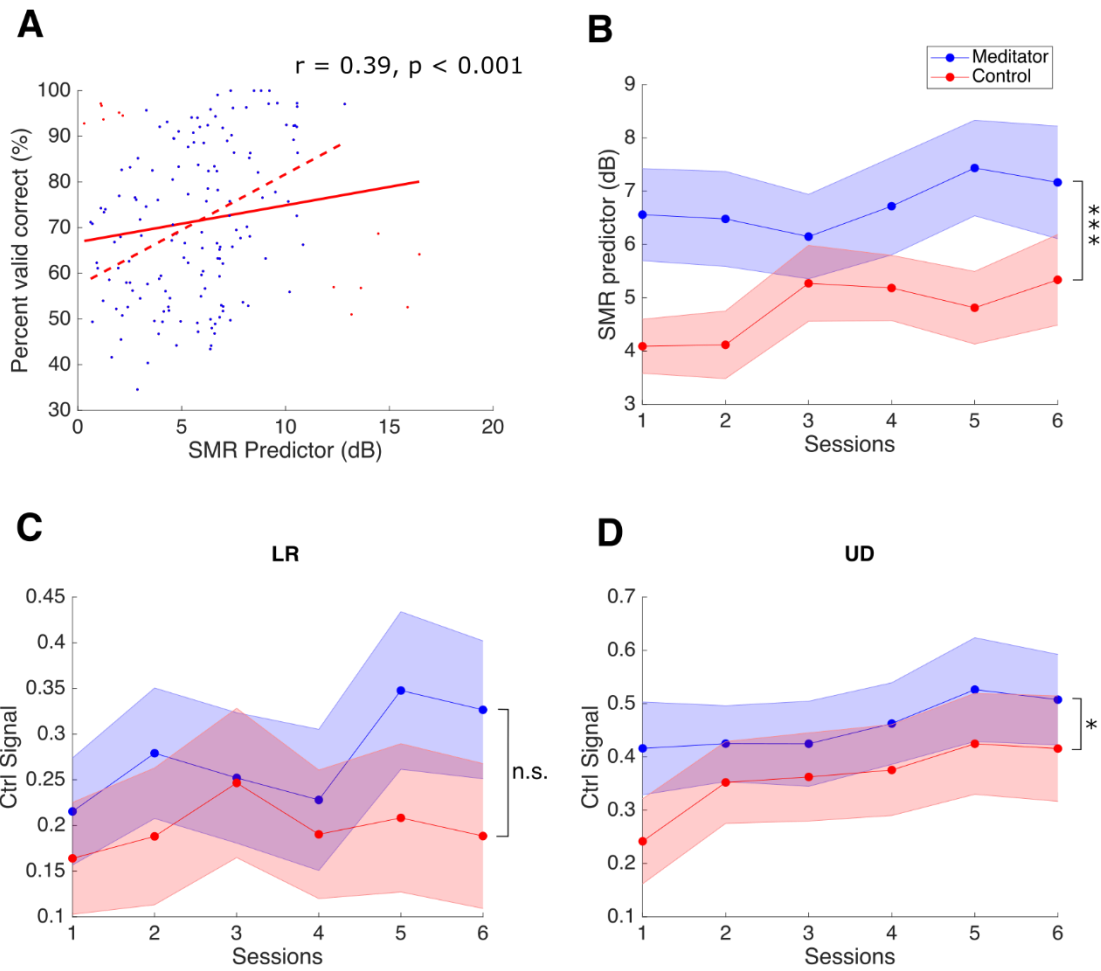

408

409 **Figure 5. (A)** Regression between SMR predictor and PVC, for LR task. The red line is the regression  
 410 line, and red dashed line is the regression line after removing outlier (red points). The plot for UD task  
 411 is similar and not shown. **(B)** Group averaged SMR predictor between meditator and controls,  
 412 significance in the group effect is found. **(C, D)** Control signal learning as sessions go on for **(C)** LR  
 413 and **(D)** UD.

414

## 415 11 Supplementary Material

| Identity \ PVC (%) |          | LR   | UD   | 2D   |
|--------------------|----------|------|------|------|
| Meditator          | Baseline | 70.7 | 74.4 | 42.1 |
|                    | Final    | 79.6 | 79.2 | 50.4 |

|         |          |      |      |      |
|---------|----------|------|------|------|
| Control | Baseline | 62.8 | 62.9 | 36.5 |
|         | Final    | 68.6 | 70.9 | 40.2 |

416 Table S1. Group averaged performance from baseline and final session

417

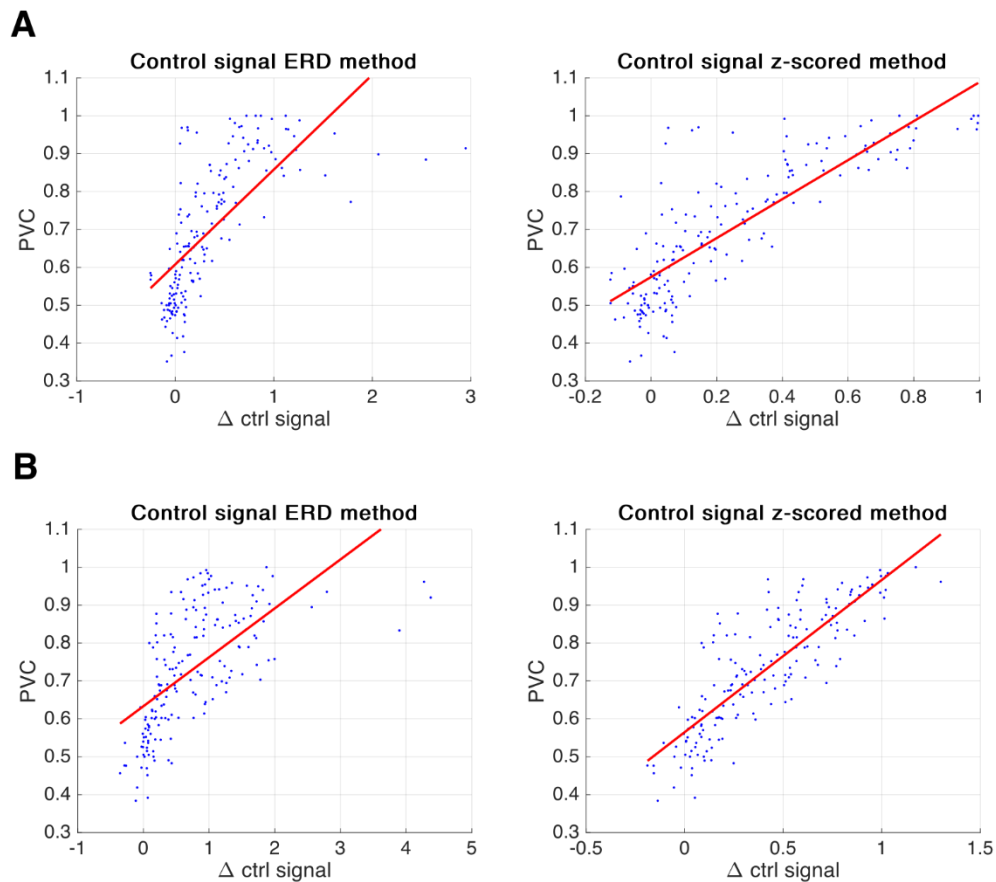

418

419 **Figure S1. Comparison of two methods to compute the control signal during task execution.**

420 The traditional method to quantify how EEG band power changes during task execution is event-  
421 related desynchronization. Concretely, the control signal under the ERD definition would be band  
422 power normalized by the resting state alpha activity. Here we argue that the control signal using the  
423 z-score method would be a better metric by showing that it explains more performance variability.  
424 (A) in LR, the correlation coefficient for regression between  $\Delta$ Ctrl Signal and PVC was 0.69 and  
425 0.83 in the ERD method and z-scored method, (B) for UD the it was 0.62 and 0.84,  $p < 0.05$ .

426

427 **12 Data Availability Statement**

428 The data presented here are available upon reasonable request from the corresponding author.

429

### 430 **13 References**

431 Ang, K. K., Chua, K. S. G., Phua, K. S., Wang, C., Chin, Z. Y., Kuah, C. W. K., et al. (2015). A  
432 Randomized Controlled Trial of EEG-Based Motor Imagery Brain-Computer Interface  
433 Robotic Rehabilitation for Stroke. *Clin EEG Neurosci* 46, 310–320.  
434 doi:10.1177/1550059414522229.

435 Armour, B. S., Courtney-Long, E. A., Fox, M. H., Fredine, H., and Cahill, A. (2016). Prevalence and  
436 Causes of Paralysis—United States, 2013. *Am J Public Health* 106, 1855–1857.  
437 doi:10.2105/AJPH.2016.303270.

438 Bakardjian, H., Tanaka, T., and Cichocki, A. (2010). Optimization of SSVEP brain responses with  
439 application to eight-command Brain-Computer Interface. *Neuroscience Letters* 469, 34–38.  
440 doi:10.1016/j.neulet.2009.11.039.

441 Bernier, R., Dawson, G., Webb, S., and Murias, M. (2007). EEG mu rhythm and imitation  
442 impairments in individuals with autism spectrum disorder. *Brain and Cognition* 64, 228–237.  
443 doi:10.1016/j.bandc.2007.03.004.

444 Blankertz, B., Sannelli, C., Halder, S., Hammer, E. M., Kübler, A., Müller, K.-R., et al. (2010).  
445 Neurophysiological predictor of SMR-based BCI performance. *NeuroImage* 51, 1303–1309.  
446 doi:10.1016/j.neuroimage.2010.03.022.

447 Botrel, L., and Kübler, A. (2019). Week-long visuomotor coordination and relaxation trainings do  
448 not increase sensorimotor rhythms (SMR) based brain-computer interface performance.  
449 *Behavioural Brain Research* 372, 111993. doi:10.1016/j.bbr.2019.111993.

450 Brown, K. W., and Ryan, R. M. (2003). The benefits of being present: mindfulness and its role in  
451 psychological well-being. *undefined*.

452 Cassady, K., You, A., Doud, A., and He, B. (2014). The impact of mind-body awareness training on  
453 the early learning of a brain-computer interface. *Technology* 02, 254–260.  
454 doi:10.1142/S233954781450023X.

455 Chan, D., and Woollacott, M. (2007). Effects of Level of Meditation Experience on Attentional  
456 Focus: Is the Efficiency of Executive or Orientation Networks Improved? *The Journal of*  
457 *Alternative and Complementary Medicine* 13, 651–658. doi:10.1089/acm.2007.7022.

458 Combrisson, E., and Jerbi, K. (2015). Exceeding chance level by chance: The caveat of theoretical  
459 chance levels in brain signal classification and statistical assessment of decoding accuracy.  
460 *Journal of Neuroscience Methods* 250, 126–136. doi:10.1016/j.jneumeth.2015.01.010.

461 Edelman, B. J., Meng, J., Suma, D., Zurn, C., Nagarajan, E., Baxter, B. S., et al. (2019). Noninvasive  
462 neuroimaging enhances continuous neural tracking for robotic device control. *Science*  
463 *Robotics* 4. doi:10.1126/scirobotics.aaw6844.

- 464 Fazel-Rezai, R., Allison, B. Z., Guger, C., Sellers, E. W., Kleih, S. C., and Kübler, A. (2012). P300  
465 brain computer interface: current challenges and emerging trends. *Front. Neuroeng.* 5.  
466 doi:10.3389/fneng.2012.00014.
- 467 Galán, F., Nuttin, M., Lew, E., Ferrez, P. W., Vanacker, G., Philips, J., et al. (2008). A brain-actuated  
468 wheelchair: Asynchronous and non-invasive Brain–computer interfaces for continuous  
469 control of robots. *Clinical Neurophysiology* 119, 2159–2169.  
470 doi:10.1016/j.clinph.2008.06.001.
- 471 He, B., Baxter, B., Edelman, B. J., Cline, C. C., and Ye, W. W. (2015). Noninvasive Brain-Computer  
472 Interfaces Based on Sensorimotor Rhythms. *Proceedings of the IEEE* 103, 907–925.  
473 doi:10.1109/JPROC.2015.2407272.
- 474 He, B., Han, Y., Meng, J., and Gao, S. (2020). “Brain–Computer Interfaces,” in B. He (Ed.), *Neural*  
475 *Engineering, 3rd edition*, (Springer US).
- 476 Huang, D., Qian, K., Fei, D.-Y., Jia, W., Chen, X., and Bai, O. (2012). Electroencephalography  
477 (EEG)-Based Brain–Computer Interface (BCI): A 2-D Virtual Wheelchair Control Based on  
478 Event-Related Desynchronization/Synchronization and State Control. *IEEE Transactions on*  
479 *Neural Systems and Rehabilitation Engineering* 20, 379–388.  
480 doi:10.1109/TNSRE.2012.2190299.
- 481 Kerr, C. E., Sacchet, M. D., Lazar, S. W., Moore, C. I., and Jones, S. R. (2013). Mindfulness starts  
482 with the body: somatosensory attention and top-down modulation of cortical alpha rhythms in  
483 mindfulness meditation. *Front. Hum. Neurosci.* 7. doi:10.3389/fnhum.2013.00012.
- 484 Kober, S. E., Witte, M., Ninaus, M., Koschutnig, K., Wiesen, D., Zaiser, G., et al. (2017). Ability to  
485 Gain Control Over One’s Own Brain Activity and its Relation to Spiritual Practice: A  
486 Multimodal Imaging Study. *Front. Hum. Neurosci.* 11. doi:10.3389/fnhum.2017.00271.
- 487 LaFleur, K., Cassady, K., Doud, A., Shades, K., Rogin, E., and He, B. (2013). Quadcopter control in  
488 three-dimensional space using a noninvasive motor imagery-based brain–computer interface.  
489 *J. Neural Eng.* 10, 046003. doi:10.1088/1741-2560/10/4/046003.
- 490 Lotte, F., and Guan, C. (2011). Regularizing Common Spatial Patterns to Improve BCI Designs:  
491 Unified Theory and New Algorithms. *IEEE Transactions on Biomedical Engineering* 58,  
492 355–362. doi:10.1109/TBME.2010.2082539.
- 493 MacLean, K. A., Ferrer, E., Aichele, S. R., Bridwell, D. A., Zanesco, A. P., Jacobs, T. L., et al.  
494 (2010). Intensive Meditation Training Improves Perceptual Discrimination and Sustained  
495 Attention. *Psychol Sci* 21, 829–839. doi:10.1177/0956797610371339.
- 496 Maynard, E. M., Nordhausen, C. T., and Normann, R. A. (1997). The Utah Intracortical Electrode  
497 Array: A recording structure for potential brain-computer interfaces. *Electroencephalography*  
498 *and Clinical Neurophysiology* 102, 228–239. doi:10.1016/S0013-4694(96)95176-0.
- 499 McFarland, D. J., Sarnacki, W. A., and Wolpaw, J. R. (2010). Electroencephalographic (EEG)  
500 control of three-dimensional movement. *J. Neural Eng.* 7, 036007. doi:10.1088/1741-  
501 2560/7/3/036007.



- 502 Meng, J., Streitz, T., Gulachek, N., Suma, D., and He, B. (2018). Three-Dimensional Brain–  
503 Computer Interface Control Through Simultaneous Overt Spatial Attentional and Motor  
504 Imagery Tasks. *IEEE Transactions on Biomedical Engineering* 65, 2417–2427.  
505 doi:10.1109/TBME.2018.2872855.
- 506 Meng, J., Zhang, S., Bekyo, A., Olsoe, J., Baxter, B., and He, B. (2016). Noninvasive  
507 Electroencephalogram Based Control of a Robotic Arm for Reach and Grasp Tasks. *Scientific*  
508 *Reports* 6, 1–15. doi:10.1038/srep38565.
- 509 Moore, A., and Malinowski, P. (2009). Meditation, mindfulness and cognitive flexibility.  
510 *Consciousness and Cognition* 18, 176–186. doi:10.1016/j.concog.2008.12.008.
- 511 Perdikis, S., Tonin, L., Saeedi, S., Schneider, C., and Millán, J. del R. (2018). The Cyathlon BCI  
512 race: Successful longitudinal mutual learning with two tetraplegic users. *PLOS Biology* 16,  
513 e2003787. doi:10.1371/journal.pbio.2003787.
- 514 Pfurtscheller, G., and Aranibar, A. (1979). Evaluation of event-related desynchronization (ERD)  
515 preceding and following voluntary self-paced movement. *Electroencephalography and*  
516 *Clinical Neurophysiology* 46, 138–146. doi:10.1016/0013-4694(79)90063-4.
- 517 Pfurtscheller, G., Brunner, C., Schlögl, A., and Lopes da Silva, F. H. (2006). Mu rhythm  
518 (de)synchronization and EEG single-trial classification of different motor imagery tasks.  
519 *NeuroImage* 31, 153–159. doi:10.1016/j.neuroimage.2005.12.003.
- 520 Rebsamen, B., Guan, C., Zhang, H., Wang, C., Teo, C., Ang, M. H., et al. (2010). A Brain Controlled  
521 Wheelchair to Navigate in Familiar Environments. *IEEE Transactions on Neural Systems and*  
522 *Rehabilitation Engineering* 18, 590–598. doi:10.1109/TNSRE.2010.2049862.
- 523 Rimbert, S., Zaepffel, M., Riff, P., Adam, P., and Bougrain, L. (2019). Hypnotic State Modulates  
524 Sensorimotor Beta Rhythms During Real Movement and Motor Imagery. *Front. Psychol.* 10.  
525 doi:10.3389/fpsyg.2019.02341.
- 526 Roland, J., Miller, K., Freudenburg, Z., Sharma, M., Smyth, M., Gaona, C., et al. (2011). The effect  
527 of age on human motor electrocorticographic signals and implications for brain–computer  
528 interface applications. *J. Neural Eng.* 8, 046013. doi:10.1088/1741-2560/8/4/046013.
- 529 Schalk, G., Kubánek, J., Miller, K. J., Anderson, N. R., Leuthardt, E. C., Ojemann, J. G., et al.  
530 (2007). Decoding two-dimensional movement trajectories using electrocorticographic signals  
531 in humans. *J. Neural Eng.* 4, 264–275. doi:10.1088/1741-2560/4/3/012.
- 532 Schalk, G., McFarland, D. J., Hinterberger, T., Birbaumer, N., and Wolpaw, J. R. (2004). BCI2000: a  
533 general-purpose brain-computer interface (BCI) system. *IEEE Transactions on Biomedical*  
534 *Engineering* 51, 1034–1043. doi:10.1109/TBME.2004.827072.
- 535 Stieger, J. R., Engel, S., Jiang, H., Cline, C. C., Kreitzer, M. J., and He, B. (2020). Mindfulness  
536 Improves Brain Computer Interface Performance by Increasing Control over Neural Activity  
537 in the Alpha Band. *bioRxiv*, 2020.04.13.039081. doi:10.1101/2020.04.13.039081.

- 538 Tan, Dienes, Z., Jansari, A., and Goh, S.-Y. (2014). Effect of mindfulness meditation on brain–  
539 computer interface performance. *Consciousness and Cognition* 23, 12–21.  
540 doi:10.1016/j.concog.2013.10.010.
- 541 Tan, Y.-Q., Tan, L.-F., Mok, S.-Y., and Goh, S.-Y. (2015). Effect of short term meditation on  
542 braincomputer interface performance. *Journal of Medical and Biological Engineering Vol 4*.
- 543 Tang, Y.-Y., Hölzel, B. K., and Posner, M. I. (2015). The neuroscience of mindfulness meditation.  
544 *Nature Reviews Neuroscience* 16, 213–225. doi:10.1038/nrn3916.
- 545 Tang, Y.-Y., Ma, Y., Wang, J., Fan, Y., Feng, S., Lu, Q., et al. (2007). Short-term meditation training  
546 improves attention and self-regulation. *PNAS* 104, 17152–17156.  
547 doi:10.1073/pnas.0707678104.
- 548 Trejo, L. J., Rosipal, R., and Matthews, B. (2006). Brain-computer interfaces for 1-D and 2-D cursor  
549 control: designs using volitional control of the EEG spectrum or steady-state visual evoked  
550 potentials. *IEEE Transactions on Neural Systems and Rehabilitation Engineering* 14, 225–  
551 229. doi:10.1109/TNSRE.2006.875578.
- 552 Walach, H., Buchheld, N., Büttenmüller, V., Kleinknecht, N., and Schmidt, S. (2006). Measuring  
553 mindfulness—the Freiburg Mindfulness Inventory (FMI). *Personality and Individual  
554 Differences* 40, 1543–1555. doi:10.1016/j.paid.2005.11.025.
- 555 Wolpaw, J. R., Birbaumer, N., McFarland, D. J., Pfurtscheller, G., and Vaughan, T. M. (2002).  
556 Brain–computer interfaces for communication and control. *Clinical Neurophysiology* 113,  
557 767–791. doi:10.1016/S1388-2457(02)00057-3.
- 558 Wolpaw, J. R., McFarland, D. J., Neat, G. W., and Forneris, C. A. (1991). An EEG-based brain-  
559 computer interface for cursor control. *Electroencephalography and Clinical Neurophysiology*  
560 78, 252–259. doi:10.1016/0013-4694(91)90040-B.

561
